# Supplementary material for: Integrating artificial with natural cells to translate chemical messages that direct E. coli behaviour
Source: PubMed Central journal article supplement (PMC4050265; doi:10.1038/ncomms5012), 2014-05-30
Supplement: ncomms5012-s1.pdf [file ncomms5012-s1.pdf]

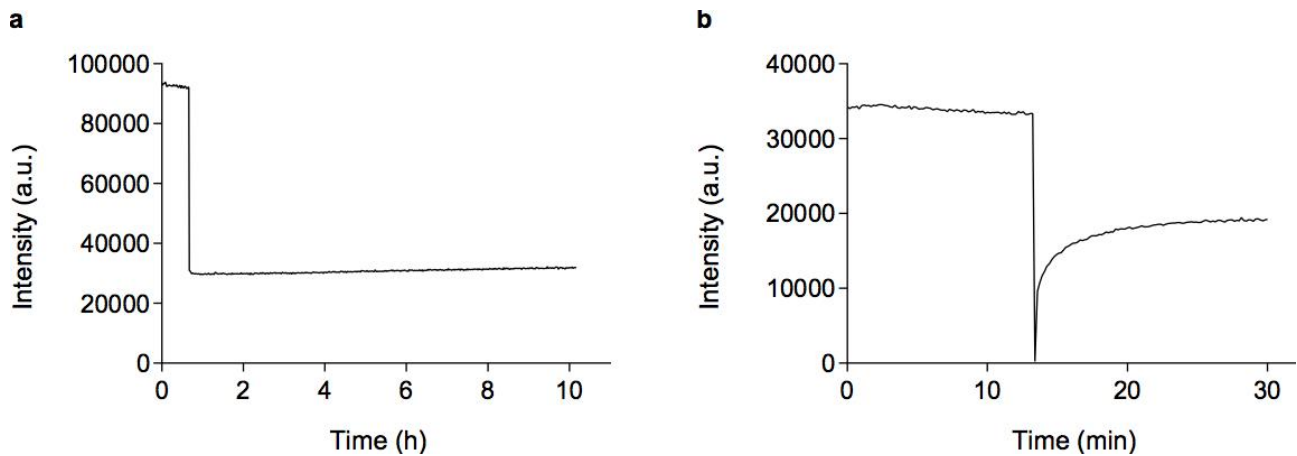

**Supplementary Figure 1. Vesicle permeability to IPTG.** (A) A shrink-swell<sup>2-4</sup> assay was used to assess whether IPTG was capable of crossing vesicle membranes. POPC:cholesterol vesicles with entrapped calcein were prepared in 10 mM MgCl<sub>2</sub>, 100 mM KCl, 50 mM HEPES, pH 7.6 as described in the methods and subsequently purified by gel filtration chromatography with sepharose-4b. An aliquot of the vesicle sample was diluted two-fold with 1.0 M IPTG (final concentration = 0.5 M) at 37 °C. The reaction was monitored by fluorescence with excitation and emission wavelengths of 495 nm and 515 nm, respectively. The rapid decrease in fluorescence was due to both dilution with the solute solution and calcein self-quenching. If IPTG were capable of crossing the membrane, a recovery of fluorescence would have been observed. (B) The permeability of POPC vesicles to ribose was observable with the shrink-swell assay. The recovery in fluorescence after two-fold dilution with 1.0 M ribose (final concentration = 0.5 M) was due to equilibration of ribose and water across the membrane.

**Supplementary Table 1. DNA sequences used in this study**

| NAME   | NOTE                                                                    | SEQUENCE                                                                                                                                                                                                                                                                                                                                                                                                                                                                                                                                                                                                                                                                                                                                                                                                                                                                                                                                                                                                                                                                                                                                                                                                                                                                                                                                                                                                                                                                                                                                                                                                                                                                                                                                                                                                                                                                                                                                                                                                            |
|--------|-------------------------------------------------------------------------|---------------------------------------------------------------------------------------------------------------------------------------------------------------------------------------------------------------------------------------------------------------------------------------------------------------------------------------------------------------------------------------------------------------------------------------------------------------------------------------------------------------------------------------------------------------------------------------------------------------------------------------------------------------------------------------------------------------------------------------------------------------------------------------------------------------------------------------------------------------------------------------------------------------------------------------------------------------------------------------------------------------------------------------------------------------------------------------------------------------------------------------------------------------------------------------------------------------------------------------------------------------------------------------------------------------------------------------------------------------------------------------------------------------------------------------------------------------------------------------------------------------------------------------------------------------------------------------------------------------------------------------------------------------------------------------------------------------------------------------------------------------------------------------------------------------------------------------------------------------------------------------------------------------------------------------------------------------------------------------------------------------------|
| AS014A | T7 promoter, K30S<br>E31T $\alpha$ HL-sfGFP                             | <p>ATTTAATACGACTCACTATAG<b>ATG</b>GATTCTGATATCAATATCAAAAACGGCACCACCGATATCGGCTC<br/> CAATACCACCGTTAAAACCGGTGATCTGGTGACCTATGATTCTACCAACGGTATGCATAAAAAAGTGT<br/> TTTACTCGTTTATTGACGATAAAAACCATAACAAAAAACTGCTGGTCATCCGCACCAAAGGCACCATTG<br/> CGGGTCAATACCGTGTGACTCCGAAGAAGGTGCGAACAAAAGCGGTCTGGCTTGCCGTCTGCCTT<br/> TAAAGTGACAGTGCAACTGCCGGATAATGAAGTGCGCAGATTTTCAAGTTATTATCCGCGTAATAGCA<br/> TCGATACCAAAGAATATATGAGTACCCTGACCTATGGTTTTAATGGCAATGTTACCGGTGATGATACG<br/> GGTAAAATTGGCGGTCTGATTGGCGCCAATGTGTCCATTGGTCATACGCTGAAATACGTGCAACCGG<br/> ATTTCAAACCATTTCTGAAAAGTCCGACCGATAAAAAAGTGGGTTGAAAAGTTATCTTCAACAACATG<br/> GTGAATCAGAACTGGGGTCCGTACGATCGCGATTCTGGAATCCGGTTTATGGCAATCAGCTGTTTAT<br/> GAAAACCCGCAACGGTAGTATGAAAGCGGCGGATAATTTTCTGGACCCGAACAAAGCCTCAAGCCTG<br/> CTGTCCAGCGGTTTTAGCCCGATTTTCCACGGTTATTACCATGGATCGAAAGCCAGCAAACAGCA<br/> GACCAACATTGATGTGATCTACGAACGTGTGCGTGATGATTATCAACTGCATTGGACCTCAACCAATT<br/> GGAAAGGCACCAATACCAAAGATAAATGGACGGATCGCAGTTCAGAACGCTACAAAATTGATTGGGA<br/> AAAAGAAGAAATGACCAACGGATCCGGCAGCGGTTCT<b>ATG</b>CGTAAAGGCGAAGAGCTGTTCACTGG<br/> TGTCGTCCCTATTCTGGTGGAACTGGATGGTGTGTCACCGTGCATAAGTTTTCCGTGCGTGGCGAGG<br/> GTGAAGGTGACGCAACTAATGGTAACTGACGCTGAAGTTCATCTGTACTACTGGTAACTGCCGGTA<br/> CCTTGGCCGACTCTGGTAACGACGCTGACTTATGGTGTTCAAGTCTTGTCTGTTATCCGGACCATATG<br/> AAGCAGCATGACTTCTCAAGTCCGCCATGCCGGAAGGCTATGTGCAGGAACGCACGATTTCTTTAA<br/> GGATGACGGCACGTACAAAACGCGTGCGGAAGTGAATTTGAAGGCGATAACCTGGTAAACCGCATT<br/> GAGCTGAAAGGCATTGACTTTAAAGAAGACGGCAATATCCTGGGCCATAAGCTGGAATACAATTTTA<br/> ACAGCCACAATGTTTACATCACCGCCGATAAACAAAAAATGGCATTAAAGCGAATTTTAAATTCGC<br/> CACAACGTGGAGGATGGCAGCGTGCAGCTGGCTGATCACTACCAGCAAACACTCCAATCGGTGATG<br/> GTCCTGTTCTGCTGCCAGACAATCACTATCTGAGCACGCAAAGCGTTCTGTCTAAAGATCCGAACGAG<br/> AAACGCGATCATATGGTTCTGCTGGAGTTCGTAACCGCAGCGGGCATCACGCATGGTATGGATGAAC<br/> TGTACAAA<b>TAA</b>CTCGAGCACCACCACCACCACCCTGAGATCCGGCTGTAACAAAGCCCGAAAGGA<br/> AGCTGAGTTGGCTGCTGCCACCGCTGAGCAATAACTAGCATAACCCCTTGGGGCCTCTAAACGGGTCT<br/> TGAGGGGTTTTTTG</p> |
| DT101A | T7 promoter, $\alpha$ HL-<br>His tag                                    | <p>TAATACGACTCACTATAGGGGAATTGTGAGCGGATAACAATTCCTCTAGAAATAATTTGTTAACT<br/> TTAAGAAGGAGATATACAT<b>ATG</b>GATTCTGATATCAATATCAAAAACGGCACCACCGATATCGGCTCC<br/> AATACCACCGTTAAAACCGGTGATCTGGTGACCTATGATAAAGAAAACGGTATGCATAAAAAAGTGT<br/> TTTACTCGTTTATTGACGATAAAAACCATAACAAAAAACTGCTGGTCATCCGCACCAAAGGCACCATTG<br/> GGGTCAATACCGTGTGACTCCGAAGAAGGTGCGAACAAAAGCGGTCTGGCTTGCCGTCTGCCTTT<br/> AAAGTGACAGTGCAACTGCCGGATAATGAAGTGCGCAGATTTTCAAGTTATTATCCGCGTAATAGCAT<br/> CGATACCAAAGAATATATGAGTACCCTGACCTATGGTTTTAATGGCAATGTTACCGGTGATGATACGG<br/> GTAAAATTGGCGGTCTGATTGGCGCCAATGTGTCCATTGGTCATACGCTGAAATACGTGCAACCGGAT<br/> TTCAAACCATTTCTGAAAAGTCCGACCGATAAAAAAGTGGGTTGAAAAGTTATCTTCAACAACATGGT<br/> GAATCAGAACTGGGGTCCGTACGATCGCGATTCTGGAATCCGGTTTATGGCAATCAGCTGTTTATGA<br/> AAACCCGCAACGGTAGTATGAAAGCGGCGGATAATTTTCTGGACCCGAACAAAGCCTCAAGCCTGCT<br/> GTCCAGCGGTTTTAGCCCGGATTTTCCACGGTTATTACCATGGATCGCAAAGCCAGCAAACAGCAGA<br/> CCAACATTGATGTGATCTACGAACGTGTGCGTGATGATTATCAACTGCATTGGACCTCAACCAATTGG<br/> AAAGGCACCAATACCAAAGATAAATGGACGGATCGCAGTTCAGAACGCTACAAAATTGATTGGGAAA<br/> AAGAAGAAATGACCAACCTCGAGCACCACCACCACCACC<b>TG</b>AGATCCGGCTGCTAACAAAGCCCG<br/> AAAGGAAGCTGAGTTGGCTGCTGCCACCGCTGAGCAATAACTAGCATAACCCCTTGGGGCCTCTAAAC<br/> GGGTCTTGAGGGGTTTTTTG</p>                                                                                                                                                                                                                                                                                                                                                                                                                                                                                                                                                                                                                                                                                                                                                         |
| JF001A | T7 promoter,<br><u>theophylline</u><br><u>riboswitch</u><br>$\alpha$ HL | <p>AATTAATACGACTCACTATAGGGTGATACCAGCATCGTCTTGATGCCCTTGGCAGCACCTGCTAAGG<br/> <u>TAACAACAAG<b>ATG</b></u>GATTCTGATATCAATATCAAAAACGGCACCACCGATATCGGCTCCAATACCACCG<br/> TTAAAACCGGTGATCTGGTGACCTATGATAAAGAAAACGGTATGCATAAA AAAGTGTTTTACTCGTTT<br/> ATTGACGATAAAAACCATAACAAAAAACTGCTGGTCATCCGCACCAAAGGCACCATTGCCGGTCAATA<br/> CCGTGTGTACTCCGAAGAAGGTGCGAACAAAAGCGGTCTGGCTTGCCGTCTGCCTTTAAAGTGACG<br/> CTGCAACTGCCGGATAATGAAGTGCGCAGATTTTCAAGTTATTATCCGCGTAATAGCATCGATACCAA</p>                                                                                                                                                                                                                                                                                                                                                                                                                                                                                                                                                                                                                                                                                                                                                                                                                                                                                                                                                                                                                                                                                                                                                                                                                                                                                                                                                                                                                                                                                                                                           |

|        |                                                                    |                                                                                                                                                                                                                                                                                                                                                                                                                                                                                                                                                                                                                                                                                                                                                                                                                                                                                                                                                                                                                                                                                                                                                                                                                                                                                                                                                                                                                                                                                                                                                                                                                                                                                                                                                                                                                                                                                                                                |
|--------|--------------------------------------------------------------------|--------------------------------------------------------------------------------------------------------------------------------------------------------------------------------------------------------------------------------------------------------------------------------------------------------------------------------------------------------------------------------------------------------------------------------------------------------------------------------------------------------------------------------------------------------------------------------------------------------------------------------------------------------------------------------------------------------------------------------------------------------------------------------------------------------------------------------------------------------------------------------------------------------------------------------------------------------------------------------------------------------------------------------------------------------------------------------------------------------------------------------------------------------------------------------------------------------------------------------------------------------------------------------------------------------------------------------------------------------------------------------------------------------------------------------------------------------------------------------------------------------------------------------------------------------------------------------------------------------------------------------------------------------------------------------------------------------------------------------------------------------------------------------------------------------------------------------------------------------------------------------------------------------------------------------|
|        |                                                                    | <p>AGAATATATGAGTACCCTGACCTATGGTTTTAATGGCAATGTTACCGGTGATGATACGGGTAAAATTG<br/> GCGGTCTGATTGGCGCAATGTGTCCATTGGTCATACGCTGAAATACGTGCAACCGGATTTCAAAACC<br/> ATTCTGAAAAGTCCGACCGATAAAAAAGTGGGTTGAAAAGTTATCTTCAACAACATGGTGAATCAGA<br/> ACTGGGGTCCGTACGATCGCGATTCTGGAATCCGGTTTATGGCAATCAGCTGTTTATGAAAACCCGC<br/> AACGGTAGTATGAAAGCGGCGGATAATTTCTGGACCCGAACAAAGCCTCAAGCCTGCTGTCCAGCG<br/> GTTTTAGCCCGATTTTGGCCAGGTTATTACCATGGATCGAAAGCCAGCAAACAGCAGACCAACATT<br/> GATGTGATCTACGAACGTGTGCGTGATGATTATCAACTGCATTGGACCTCAACCAATTGGAAAGGCAC<br/> CAATACCAAAGATAAATGGACGGATCGCAGTTCAGAACGCTACAAAATTGATTGGGAAAAAGAAGAA<br/> ATGACCAAC<b>TAA</b>CTCGAGCACCACCACCACCACCCTGAGATCCGGCTGCTAACAAAGCCCGAAAAGG<br/> AAGCTGAGTTGGCTGCTGCCACCGCTGAGCAATAACTAGCATAACCCCTTGGGGCTCTAAACGGGTC<br/> TTGAGGGGTTTTTTG</p>                                                                                                                                                                                                                                                                                                                                                                                                                                                                                                                                                                                                                                                                                                                                                                                                                                                                                                                                                                                                                                                                                                                                        |
| RL067A | T7 promoter, αHL                                                   | <p>TAATACGACTCACTATAGGGGAATTGTGAGCGGATAACAATCCCCTCTAGAAATAATTTGTTTAACT<br/> TTAAGAAGGAGATATACAT<b>ATG</b>GATTCTGATATCAATATCAAAACCGGCACCACCGATATCGGCTCC<br/> AATACCACCGTTAAAACCGGTGATCTGGTGACCTATGATAAAGAAAACGGTATGCATAAAAAAGTGT<br/> TTACTCGTTTATTGACGATAAAAAACCATAACAAAAAAGTCTGGTTCATCCGACCAAAGGCACCATTGC<br/> GGGTCAATACCGTGTACTCCGAAGAAGGTGCGAACAAAAGCGGTCTGGCTTGGCCGTCTGCCTTT<br/> AAAGTGACGCTGCAACTGCCGGATAATGAAGTGGCGCAGATTTAGATTATTATCCGCGTAATAGCAT<br/> CGATACCAAAGAATATATGAGTACCCTGACCTATGGTTTTAATGGCAATGTTACCGGTGATGATACGG<br/> GTAAAATTGGCGGTCTGATTGGCGCAATGTGTCCATTGGTCATACGCTGAAATACGTGCAACCGGAT<br/> TTCAAAACCACTTCTGAAAAGTCCGACCGATAAAAAAGTGGGTTGAAAAGTTATCTTCAACAACATGGT<br/> GAATCAGAACTGGGGTCCGTACGATCGCGATTCTGGAATCCGGTTTATGGCAATCAGCTGTTTATGA<br/> AAACCCGCAACGGTAGTATGAAAGCGGCGGATAATTTTCTGGACCCGAACAAAGCCTCAAGCCTGCT<br/> GTCCAGCGTTTTAGCCCGATTTTGGCCAGGTTATTACCATGGATCGAAAGCCAGCAAACAGCAGAA<br/> CCAACATTGATGTGATCTACGAACGTGTGCGTGATGATTATCAACTGCATTGGACCTCAACCAATTGG<br/> AAAGGCACCAATACCAAAGATAAATGGACGGATCGCAGTTCAGAACGCTACAAAATTGATTGGGAAA<br/> AAGAAGAAATGACCAAC<b>TAA</b>CTCGAGCACCACCACCACCACCCTGAGATCCGGCTGCTAACAAAGC<br/> CCGAAAGGAAGCTGAGTTGGCTGCTGCCACCGCTGAGCAATAACTAGCATAACCCCTTGGGGCTCT<br/> AAACGGGTCTTGGGGTTTTTTG</p>                                                                                                                                                                                                                                                                                                                                                                                                                                                                                                                                                                                                                                                                   |
| RL069A | T7 promoter, <u>theophylline</u> <u>riboswitch</u> , K30S E31T αHL | <p>AATTAATACGACTCACTATAGGGTGATACCAGCATCGTCTTGATGCCCTTGGCAGCACCCCTGCTAAGG<br/> <u>TAACAACAAG</u><b>ATG</b>GATTCTGATATCAATATCAAAACCGGCACCACCGATATCGGCTCCAATACCACC<br/> GTTAAAACCGGTGATCTGGTGACCTATGATTCTACCAACGGTATGCATAAAAAAGTGTTTTACTCGTTT<br/> ATTGACGATAAAAAACCATAACAAAAAAGTCTGGTTCATCCGACCAAAGGCACCATTGCGGGTCAATA<br/> CCGTGTGTACTCCGAAGAAGGTGCGAACAAAAGCGGTCTGGCTTGGCCGTCTGCCTTTAAAGTGACG<br/> CTGCAACTGCCGGATAATGAAGTGGCGCAGATTTAGATTATTATCCGCGTAATAGCATCGATACCAA<br/> AGAATATATGAGTACCCTGACCTATGGTTTTAATGGCAATGTTACCGGTGATGATACGGGTAAAATTG<br/> GCGGTCTGATTGGCGCAATGTGTCCATTGGTCATACGCTGAAATACGTGCAACCGGATTTCAAAACC<br/> ATTCTGAAAAGTCCGACCGATAAAAAAGTGGGTTGAAAAGTTATCTTCAACAACATGGTGAATCAGA<br/> ACTGGGGTCCGTACGATCGCGATTCTGGAATCCGGTTTATGGCAATCAGCTGTTTATGAAAACCCGC<br/> AACGGTAGTATGAAAGCGGCGGATAATTTCTGGACCCGAACAAAGCCTCAAGCCTGCTGTCCAGCG<br/> GTTTTAGCCCGATTTTGGCCAGGTTATTACCATGGATCGAAAGCCAGCAAACAGCAGACCAACATT<br/> GATGTGATCTACGAACGTGTGCGTGATGATTATCAACTGCATTGGACCTCAACCAATTGGAAAGGCAC<br/> CAATACCAAAGATAAATGGACGGATCGCAGTTCAGAACGCTACAAAATTGATTGGGAAAAAGAAGAA<br/> ATGACCAACGGATCCGCGAGCGGTTCT<b>ATG</b>CGTAAAGGCGAAGAGCTGTTCACTGGTGTCTGCCCTA<br/> TTCTGGTGAACCTGGATGGTGTGATGTCAACGGTCATAAGTTTTCCGTGCGTGGCGAGGGTGAAGGTGA<br/> CGCAACTAATGGTAAACTGACGCTGAAGTTCATCTGTACTACTGGTAAACTGCCGTACCTTGGCCGA<br/> CTCTGGTAACGACGCTGACTTATGGTGTTCAGTGCTTTGCTGTTATCCGGACCATATGAAGCAGCAT<br/> GACTTCTTCAAGTCCGCCATGCCGGAAGGCTATGTGCAGGAACGCACGATTTCTTTAAGGATGACGG<br/> CACGTACAAAACGCGTGCGGAAGTGAATTTGAAGGCGATACCTGGTAAACCGCATTGAGCTGAAA<br/> GGCATTGACTTTAAGAAGACGCAATATCCTGGGCCATAAGCTGGAATACAATTTAACAGCCACAA<br/> TGTTTACATCACCGCCGATAAACAAAAAATGGCATTAAAGCGAATTTTAAATTCGCCACAACGTGG<br/> AGGATGGCAGCGTGCAGCTGGCTGATCACTACCAGCAAACACTCCAATCGGTGATGGTCTGTTCTG<br/> CTGCCAGACAATCACTATCTGAGCACGCAAAGCGTTCTGTCTAAAGATCCGAACGAGAAACGCGATCA<br/> TATGGTCTGCTGGAGTTCGTAACCGCAGCGGGCATCACGCATGGTATGGATGAACTGTACAA<b>TAA</b></p> |

|        |                                                                         |                                                                                                                                                                                                                                                                                                                                                                                                                                                                                                                                                                                                                                                                                                                                                                                                                                                                                                                                                                                                                                                                                                                                                                                                                                                                                                                                                                                                                                                                                                                                                                                                                                                                                                                                                                                                                                                                                                                                                          |
|--------|-------------------------------------------------------------------------|----------------------------------------------------------------------------------------------------------------------------------------------------------------------------------------------------------------------------------------------------------------------------------------------------------------------------------------------------------------------------------------------------------------------------------------------------------------------------------------------------------------------------------------------------------------------------------------------------------------------------------------------------------------------------------------------------------------------------------------------------------------------------------------------------------------------------------------------------------------------------------------------------------------------------------------------------------------------------------------------------------------------------------------------------------------------------------------------------------------------------------------------------------------------------------------------------------------------------------------------------------------------------------------------------------------------------------------------------------------------------------------------------------------------------------------------------------------------------------------------------------------------------------------------------------------------------------------------------------------------------------------------------------------------------------------------------------------------------------------------------------------------------------------------------------------------------------------------------------------------------------------------------------------------------------------------------------|
|        |                                                                         | CTCGAGCACCACCACCACCACCCTGAGATCCGGCTGCTAACAAAGCCCGAAAGGAAGCTGAGTTGG<br>CTGCTGCCACCGCTGAGCAATAACTAGCATAACCCCTTGGGGCCTCTAACCGGTCTTGAGGGTTTT<br>TTG                                                                                                                                                                                                                                                                                                                                                                                                                                                                                                                                                                                                                                                                                                                                                                                                                                                                                                                                                                                                                                                                                                                                                                                                                                                                                                                                                                                                                                                                                                                                                                                                                                                                                                                                                                                                          |
| SP002A | T7 promoter,<br>αHL-sfGFP                                               | ATTTAATACGACTCACTATAG <b>ATG</b> GATTCTGATATCAATATCAAACCGGCACCACCGATATCGGCTC<br>CAATACCACCGTTAAAACCGGTGATCTGGTGACCTATGATAAAGAAAACGGTATGCATAAAAAAGTGT<br>TTTACTCGTTTTATTGACGATAAAAAACCATAACAAAAAACTGCTGGTCATCCGCACCAAAGGCACCATTG<br>CGGGTCAATACCGTGTGACTCCGAAGAAGGTGCGAACAAAAGCGGTCTGGCTTGGCCGTCTGCCTT<br>TAAAGTGACGCTGCAACTGCCGATAATGAAGTGGCGCAGATTTAGATTATTATCCGCGTAATAGCA<br>TCGATACCAAAGAATATATGAGTACCCTGACCTATGGTTTTAATGGCAATGTTACCGGTGATGATACG<br>GGTAAAATTGGCGGTCTGATTGGCGCAATGTGTCCATTGGTCATACGCTGAAATACGTGCAACCGG<br>ATTTCAAACCACTTCTGGAAAGTCCGACCGATAAAAAAGTGGGTTGGAAAGTTATCTTCAACAACATG<br>GTGAATCAGAAGTGGGGTCCGTACGATCGCGATTCTGGAATCCGGTTTATGGCAATCAGCTGTTTAT<br>GAAAACCGCAACGGTAGTATGAAAGCGGCGGATAATTTTCTGGACCCGAACAAAGCCTCAAGCCTG<br>CTGTCCAGCGTTTTAGCCCGGATTTTGGCACGGTATTACCATGGATCGAAAGCCAGCAAACAGCA<br>GACCAACATTGATGTGATCTACGAACGTGTGCGTGATGATTATCAACTGCATTGGACCTCAACCAATT<br>GGAAAGGCACCAATACCAAAGATAAATGGACGGATCGCAGTTCAGAACGCTACAAAATTGATTGGGA<br>AAAAGAAGAAATGACCAACGGATCCGGCAGCGTTCT <b>ATG</b> CGTAAAGGCGAAGAGCTGTTCACTGG<br>TGTCGTCCCTATTCTGGTGGAACTGGATGGTGTGCAACGGTCATAAGTTTTCCGTGCGTGGCGAGG<br>GTGAAGGTGACGCAACTAATGGTAACTGACGCTGAAGTTTCTGTACTACTGGTAACTGCCGGTA<br>CCTTGGCCGACTCTGGTAACGACGCTGACTTATGGTGTTCAAGTCTTGTCTGTTATCCGGACCATATG<br>AAGCAGCATGACTTCTCAAGTCCGCCATGCCGGAAGGCTATGTGCAGGAACGCACGATTTCTTTAA<br>GGATGACGGCACGTACAAAACGCGTGCAGGAAAGTAAATTTGAAGGCGATACCTGGTAAACCGCATT<br>GAGCTGAAAGGCATTGACTTTAAAGAAGACGGCAATATCCTGGGCCATAAGCTGGAATACAATTTTA<br>ACAGCCACAATGTTTACATCACCGCCGATAAACAAAAAAATGGCATTAAAGCGAATTTTAAATTCGC<br>CACAACGTGGAGGATGGCAGCGTGCAGCTGGCTGATCACTACCAGCAAAACACTCCAATCGGTGATG<br>GTCCTGTTCTGCTGCCAGACAATCACTATCTGAGCACGCAAAGCGTTCTGTCTAAAGATCCGAACGAG<br>AAACGCGATCATATGGTCTGCTGGAGTTCTGTAACCGCAGCGGCATCACGATGGTATGGATGAAC<br>TGTAACA <b>TA</b> ACTCGAGCACCACCACCACCACCCTGAGATCCGGCTGCTAACAAAGCCCGAAAGGA<br>AGCTGAGTTGGCTGCTGCCACCGCTGAGCAATAACTAGCATAACCCCTTGGGGCCTCTAACCGGTCT<br>TGAGGGGTTTTTTG |
| SP011A | T7 promoter,<br><u>theophylline</u><br><u>riboswitch</u> ,<br>αHL-sfGFP | AATTAATACGACTCACTATAGGGTGATACCAGCATCGTCTTGATGCCCTTGGCAGCACCTGCTAAGG<br><u>TAACAACAAG</u> <b>ATG</b> GATTCTGATATCAATATCAAACCGGCACCACCGATATCGGCTCCAATACCACC<br>GTAAAACCGGTGATCTGGTGACCTATGATAAAGAAAACGGTATGCATAAAAAAGTGTTTTACTCGTT<br>TATTGACGATAAAAAACCATAACAAAAAACTGCTGGTCATCCGCACCAAAGGCACCATTGCGGGTCAAT<br>ACCGTGTGACTCCGAAGAAGGTGCGAACAAAAGCGGTCTGGCTTGGCCGTCTGCCTTTAAAGTGCA<br>GCTGCAACTGCCGATAATGAAGTGGCGCAGATTTAGATTATTATCCGCGTAATAGCATCGATACCA<br>AAGAATATATGAGTACCCTGACCTATGGTTTTAATGGCAATGTTACCGGTGATGATACGGGTAATAAT<br>GGCGGTCTGATTGGCGCAATGTGTCCATTGGTCATACGCTGAAATACGTGCAACCGGATTTCAAAC<br>CATTCTGGAAAGTCCGACCGATAAAAAAGTGGGTTGGAAAGTTATCTTCAACAACATGGTGAATCAG<br>AACTGGGGTCCGTACGATCGCGATTCTGGAATCCGGTTTATGGCAATCAGCTGTTTATGAAAACCGG<br>CAACGGTAGTATGAAAGCGGCGGATAATTTTCTGGACCCGAACAAAGCCTCAAGCCTGCTGTCCAGC<br>GGTTTTAGCCCGGATTTTGGCACGGTATTACCATGGATCGCAAAGCCAGCAAACAGCAGACCAACAT<br>TGATGTGATCTACGAACGTGTGCGTGATGATTATCAACTGCATTGGACCTCAACCAATTGGAAGGCA<br>CCAATACCAAAGATAAATGGACGGATCGCAGTTCAGAACGCTACAAAATTGATTGGGAAAAAGAAGA<br>AATGACCAACGGATCCGGCAGCGTTCT <b>ATG</b> CGTAAAGGCGAAGAGCTGTTCACTGGTGTGTCCTCT<br>ATTCTGGTGGAACTGGATGGTGTGCAACGGTCATAAGTTTTCCGTGCGTGGCGAGGGTGAAGGTG<br>ACGCAACTAATGGTAACTGACGCTGAAGTTTCTGTACTACTGGTAACTGCCGGTACCTTGGCCG<br>ACTCTGGTAACGACGCTGACTTATGGTGTTCAAGTCTTGTCTGTTATCCGGACCATATGAAGCAGCAT<br>GACTTCTCAAGTCCGCCATGCCGGAAGGCTATGTGCAGGAACGCACGATTTCTTTAAGGATGACGG<br>CACGTACAAAACGCGTGCAGGAAAGTAAATTTGAAGGCGATACCTGGTAAACCGCATTGAGCTGAAA<br>GGCATTGACTTTAAAGAAGACGGCAATATCCTGGGCCATAAGCTGGAATACAATTTTAAACGCCACAA<br>TGTTTACATCACCGCCGATAAACAAAAAAATGGCATTAAAGCGAATTTTAAATTCGCCACAACGTGG<br>AGGATGGCAGCGTGCAGCTGGCTGATCACTACCAGCAAAACACTCCAATCGGTGATGGTCTGTTCTG                                                                                                                                                                                                                                         |

|  |  |                                                                                                                                                                                                                                                                                                        |
|--|--|--------------------------------------------------------------------------------------------------------------------------------------------------------------------------------------------------------------------------------------------------------------------------------------------------------|
|  |  | CTGCCAGACAATCACTATCTGAGCACGCAAAGCGTTCTGTCTAAAGATCCGAACGAGAAACGCGATCA<br>TATGGTTCTGCTGGAGTTCGTAACCGCAGCGGGCATCACGCATGGTATGGATGAACTGTACAAA <b>TAA</b><br>CTCGAGCACCACCACCACCACCCTGAGATCCGGCTGCTAACAAAGCCGAAAGGAAGCTGAGTTGG<br>CTGCTGCCACCGCTGAGCAATAACTAGCATAACCCCTTGGGGCCTCTAACGGGTCTTGAGGGTTTTT<br>TTG |
|--|--|--------------------------------------------------------------------------------------------------------------------------------------------------------------------------------------------------------------------------------------------------------------------------------------------------------|

Start and stop codons are in bold and the theophylline riboswitch is underlined. The T7 promoter and T7 terminator sequences are TAATACGACTCACTATA and CTAGCATAACCCCTTGGGGCCTCTAACGGGTCTTGAGGGTTTTTTG, respectively.

**Supplementary Table 2. The activity of cell-free expressed  $\alpha$ HL**

| <b>construct name</b>     | <b><math>t_{1/2}</math> (min)</b> | <b>Comments</b>                                                            |
|---------------------------|-----------------------------------|----------------------------------------------------------------------------|
| JF001A                    | > 30                              | $\alpha$ HL behind theophylline riboswitch in the absence of theophylline  |
| JF001A                    | 16.5                              | $\alpha$ HL behind theophylline riboswitch in the presence of theophylline |
| DT101A                    | > 30                              | $\alpha$ HL-His tagged                                                     |
| SP002A                    | 4.5                               | $\alpha$ HL-GFP                                                            |
| RL067A                    | 10.0                              | $\alpha$ HL                                                                |
| Sigma-Aldrich $\alpha$ HL | 9.5                               | commercial $\alpha$ HL                                                     |
| CD101A <sup>1</sup>       | > 30                              | GFP                                                                        |
| AS014A                    | > 30                              | K30S E31T $\alpha$ HL-GFP lacking an internal RBS                          |

Each construct was expressed *in vitro* with the PURE system and subsequently added to rabbit red blood cells. Hemolysis was measured by attenuation as described in the methods. When indicated, the theophylline concentration was 1.5 mM. Sigma-Aldrich  $\alpha$ HL indicates purchased purified protein and was not *in vitro* expressed.

## Supplementary References

1. Lentini R., *et al.* Fluorescent proteins and in vitro genetic organization for cell-free synthetic biology. *ACS Synth. Biol.* **2**, 482-489 (2013).
2. Bittman R. & Blau L. Permeability behavior of liposomes prepared from fatty acids and fatty acid methyl esters. *Biochim. Biophys. Acta* **863**, 115-120 (1986).
3. Chen P. Y., Pearce D. & Verkman A. S. Membrane water and solute permeability determined quantitatively by self-quenching of an entrapped fluorophore. *Biochemistry* **27**, 5713-5718 (1988).
4. Sacerdote M. G. & Szostak J.W. Semipermeable lipid bilayers exhibit diastereoselectivity favoring ribose. *Proc. Natl Acad. Sci. USA.* **102**, 6004-6008 (2005).
